# Supplementary material for: Caste-specific origins of Lévy-like movement in social termites reveal social modulation of scaling laws
Source: Research Square preprint supplement (doi:10.21203/rs.3.rs-8145915/v1), 2025-12-05
Supplement: Supplementary file 1 [file Encounter efficiency.xlsx]

## Sheet: Sheet1
Caste	Encounter (number)	Distance (mm)	Per_Encounter (mm/n)	Colony
Queen	55	1813.12	21.9856	Colony1
Queen	119	2333.5	19.6092	Colony2
Queen	77	1787.97	23.2204	Colony3
Queen	155	1209.21	11.6975	Colony4
Queen	95	1095.16	11.528	Colony5
Worker	203	13758	65.7178	Colony1
Worker	495	19046.2	38.4771	Colony2
Worker	174	2507.19	14.4091	Colony3
Worker	566	13340.7	24.3075	Colony4
Worker	365	9173.92	25.134	Colony5
