# Supplementary material for: Caste-specific origins of Lévy-like movement in social termites reveal social modulation of scaling laws
Source: Research Square preprint supplement (doi:10.21203/rs.3.rs-8145915/v1), 2025-12-05
Supplement: Supplementary file 2 [file Exploration rate.xlsx]

## Sheet: Sheet1
Caste	Group_size	Exploration_rate (%)	Colony
Queen	1	17.98	Colony1
Queen	1	27.98	Colony2
Queen	1	13.05	Colony3
Queen	1	30.15	Colony4
Queen	1	28.49	Colony5
Queen	100	10.93	Colony1
Queen	100	13.35	Colony2
Queen	100	5.72	Colony3
Queen	100	6.49	Colony4
Queen	100	11.42	Colony5
Queen	200	8.31	Colony1
Queen	200	9.63	Colony2
Queen	200	3.96	Colony3
Queen	200	14.49	Colony4
Queen	200	5.93	Colony5
Queen	1000	13.23	Colony1
Queen	1000	10.26	Colony2
Queen	1000	4.88	Colony3
Queen	1000	5.7	Colony4
Queen	1000	9.88	Colony5
Worker	1	42.44	Colony1
Worker	1	27.09	Colony2
Worker	1	29.49	Colony3
Worker	1	34.51	Colony4
Worker	1	42.04	Colony5
Worker	100	40.95	Colony1
Worker	100	40.15	Colony2
Worker	100	49.07	Colony3
Worker	100	40.62	Colony4
Worker	100	22.59	Colony5
Worker	200	24.84	Colony1
Worker	200	28.06	Colony2
Worker	200	26.31	Colony3
Worker	200	22.93	Colony4
Worker	200	15.37	Colony5
Worker	1000	11.68	Colony1
Worker	1000	11.19	Colony2
Worker	1000	25.4	Colony3
Worker	1000	20.93	Colony4
Worker	1000	28.35	Colony5
