# Supplementary material for: Caste-specific origins of Lévy-like movement in social termites reveal social modulation of scaling laws
Source: Research Square preprint supplement (doi:10.21203/rs.3.rs-8145915/v1), 2025-12-05
Supplement: Supplementary file 3 [file Frequency of turning.xlsx]

## Sheet: Sheet1
Caste	Group_size	Turn_count (number/s)	Colony
Queen	1	0.89059	Colony1
Queen	1	0.901092	Colony2
Queen	1	1.20773	Colony3
Queen	1	1.03375	Colony4
Queen	1	0.745478	Colony5
Queen	100	3.50803	Colony1
Queen	100	4.15094	Colony2
Queen	100	3.38934	Colony3
Queen	100	1.81926	Colony4
Queen	100	2.41648	Colony5
Queen	200	3.34035	Colony1
Queen	200	3.29687	Colony2
Queen	200	2.97022	Colony3
Queen	200	3.64112	Colony4
Queen	1000	4.18664	Colony1
Queen	1000	4.38443	Colony2
Queen	1000	4.65307	Colony3
Queen	1000	5.75338	Colony4
Queen	1000	3.30269	Colony5
Worker	1	0.685695	Colony1
Worker	1	0.884105	Colony2
Worker	1	1.26894	Colony3
Worker	1	0.796185	Colony4
Worker	1	0.820911	Colony5
Worker	100	1.02299	Colony1
Worker	100	1.13882	Colony2
Worker	100	1.35101	Colony3
Worker	100	1.05889	Colony4
Worker	100	0.943986	Colony5
Worker	200	1.51299	Colony1
Worker	200	1.40929	Colony2
Worker	200	2.89977	Colony3
Worker	200	3.19788	Colony4
Worker	1000	3.23574	Colony1
Worker	1000	3.88413	Colony2
Worker	1000	1.48833	Colony3
Worker	1000	0.732878	Colony4
Worker	1000	1.44808	Colony5
